# Supplementary material
Source: Springer Nature journal article supplement (https://www.springermedizin.de/resource/supplementary/12967_2014_1919_MOESM1_ESM.pdf/9575100)

**Figure S1**

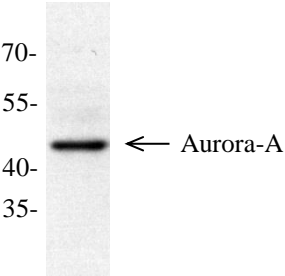

**Figure S2**

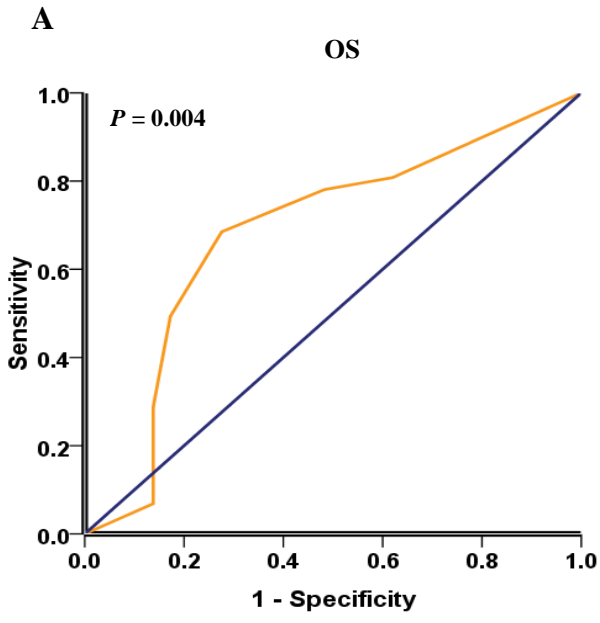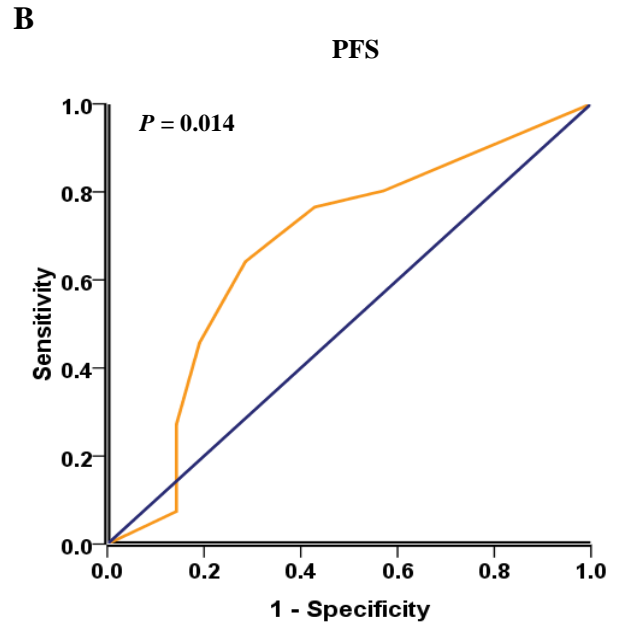

Figure S3

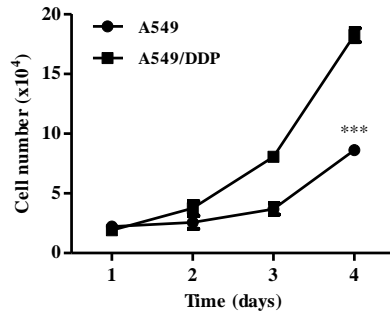

**Figure S4**

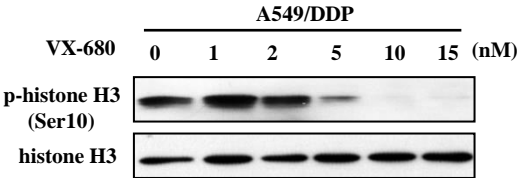

Figure S5

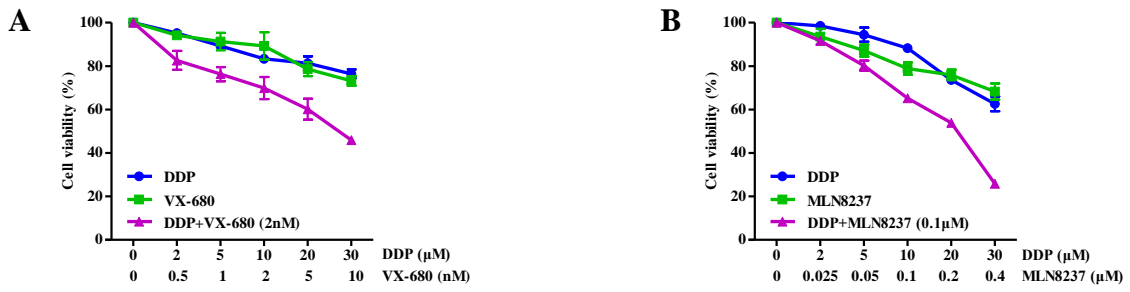

Supplement: MOESM1 [file 9575100]
